# Supplementary material
Source: PubMed Central journal article supplement (PMC5374119)
Supplement: TJP-595-2285-s001.pdf [file TJP-595-2285-s001.pdf]

# Supporting Information

## Dynamical effects of calcium-sensitive potassium currents on voltage and calcium alternans

Matthew Kennedy<sup>2</sup>, Donald M. Bers<sup>1</sup>, Nipavan Chiamvimonvat<sup>3,4</sup>, Daisuke Sato<sup>\*1</sup>

<sup>1</sup>Department of Pharmacology, University of California, Davis, California

<sup>2</sup>Department of Biomedical Engineering, University of California, Davis, California

<sup>3</sup>Division of Cardiovascular Medicine, Department of Internal Medicine, University of California, Davis, California

<sup>4</sup>Department of Veterans Affairs, Northern California Health Care System, Mather, California

### Mathematical model

We used a physiologically detailed mathematical model of the ventricular myocyte by Shiferaw et al (Shiferaw *et al.*, 2005) .

**The fast sodium current ( $I_{Na}$ ).**

$$I_{Na} = g_{Na} m^3 h j (V - E_{Na})$$

$$E_{Na} = \frac{RT}{F} \ln \left( \frac{[Na^+]_o}{[Na^+]_i} \right)$$

$$\frac{dm}{dt} = \alpha_m (1 - m) - \beta_m m$$

$$\frac{dh}{dt} = \alpha_h (1 - h) - \beta_h h$$

$$\frac{dj}{dt} = \alpha_j (1 - j) - \beta_j j$$

$$\alpha_m = 0.32 \frac{V + 47.13}{1 - e^{-0.1(V + 47.13)}}$$

$$\beta_m = 0.08 e^{-V/11}$$

$$\alpha_h = 0.135e^{(V+80)/-6.8}$$

$$\beta_h = \frac{7.5}{1 + e^{-0.1(V+1)}}$$

$$\alpha_j = \frac{0.175e^{(V+100)/-23}}{1 + e^{0.15(V+79)}}$$

$$\beta_j = \frac{0.3}{1 + e^{-0.1(V+32)}}$$

The slow time constant of recovery of the sodium channel is given by  $\tau_j = 1/(\alpha_j + \beta_j)$ . For the tissue simulations we increase  $\tau_j$  by a factor of 3 i.e.  $\alpha_j \rightarrow \alpha_j/3$  and  $\beta_j \rightarrow \beta_j/3$  in order to increase the steepness of the conduction velocity restitution.

**The transient outward  $K^+$  current ( $I_{to}$ ):**

$$I_{to} = g_{to} X_{to} Y_{to} (V - E_K)$$

$$E_K = \frac{RT}{F} \ln \left( \frac{[K^+]_o}{[K^+]_i} \right)$$

$$\frac{dX_{to}}{dt} = \alpha_{X_{to}} (1 - X_{to}) - \beta_{X_{to}} X_{to}$$

$$\frac{dY_{to}}{dt} = \alpha_{Y_{to}} (1 - Y_{to}) - \beta_{Y_{to}} Y_{to}$$

$$\alpha_{X_{to}} = 0.04516e^{0.03577V}$$

$$\beta_{X_{to}} = 0.0989e^{-0.063237V}$$

$$\alpha_{Y_{to}} = \frac{0.005415e^{(V+33.5)/-5}}{1 + 0.051335e^{(V+33.5)/-5}}$$

$$\beta_{Y_{to}} = \frac{0.005415e^{(V+33.5)/5}}{1 + 0.051335e^{(V+33.5)/5}}$$

**Inward rectifier  $K^+$  current ( $I_{K1}$ ):**

$$I_{K1} = g_{K1} K_1^\infty \frac{[K^+]_o}{[K^+]_o + 13} (V - E_K)$$

$$K_1^\infty = \frac{1}{2 + e^{1.62F/(RT)(V-E_K)}}$$

**The Rapid component of the delayed rectifier  $K^+$  current ( $I_{Kr}$ ):**

$$I_{Kr} = g_{Kr} \sqrt{\frac{[K^+]_o}{4}} x_{Kr} R(V) (V - E_K)$$

$$R(V) = \frac{1}{1 + 2.5e^{0.1(V+28)}}$$

$$\frac{dx_{Kr}}{dt} = \frac{x_{Kr}^\infty - x_{Kr}}{\tau_{Kr}}$$

$$x_{Kr}^\infty = \frac{1}{1 + e^{-2.182 - 0.1819V}}$$

$$\tau_{Kr} = 43 + \frac{1}{e^{-5.495 + 0.160V} + e^{-7.677 - 0.0128V}}$$

**The slow component of the delayed rectifier  $K^+$  current ( $I_{Ks}$ ):**

For  $I_{SK2}$  simulations, we used Shiferaw et al (Shiferaw *et al.*, 2005)  $I_{Ks}$ , which does not have a Ca-sensitive component. This ensures that negative  $Ca_i \rightarrow V_m$  coupling is due to  $I_{SK2}$

$$I_{Ks} = g_{Ks} x_{Ks}^2 (V - E_{Ks})$$

$$\frac{dx_{Ks}}{dt} = \frac{x_{Ks}^\infty - x_{Ks}}{\tau_{Ks}}$$

$$x_{Ks}^\infty = \frac{1}{1 + e^{-(V-16)/13.6}}$$

$$\tau_{Ks} = \frac{1}{\left( \frac{0.0000719(V-10)}{1 - e^{-0.148(V-10)}} + \frac{0.00031(V-10)}{-1 + e^{0.0687(V-10)}} \right)}$$

$$E_{Ks} = \frac{RT}{F} \ln \left( \frac{[K^+]_o + 0.01833[Na^+]_o}{[K^+]_i + 0.01833[Na^+]_i} \right)$$

For  $I_{Ks}$  simulations, we used Mahajan et al (Mahajan *et al.*, 2008)  $I_{Ks}$

$$I_{Ks} = g_{Ks} x_{s1} x_{s2} q_{Ks} (V - E_{Ks})$$

$$q_{Ks} = 1 + \frac{0.8}{\left(1 + \left(\frac{Km}{c_s}\right)^3\right)}$$

$$\frac{dx_{s1}}{dt} = \frac{x_s^\infty - x_{s1}}{\tau_{xs1}}$$

$$\frac{dx_{s2}}{dt} = \frac{x_s^\infty - x_{s2}}{\tau_{xs2}}$$

$$x_s^\infty = \frac{1}{1 + e^{-(V-1.5)/16.7}}$$

$$\tau_{xs1} = \frac{1}{\left(\frac{0.0000719(V+30)}{1 - e^{-0.148(V+30)}} + \frac{0.00031(V+30)}{-1 + e^{0.0687(V+30)}}\right)}$$

$$\tau_{xs2} = 4 \cdot \tau_{xs1}$$

$$E_{Ks} = \frac{RT}{F} \ln \left( \frac{[K^+]_o + 0.01833[Na^+]_o}{[K^+]_i + 0.01833[Na^+]_i} \right).$$

**The plateau potassium current ( $I_{Kp}$ ):**

$$I_{Kp} = g_{Kp} K_{Kp}(V)(V - E_K)$$

$$K_{Kp}(V) = \frac{1}{1 + e^{(7.488-V)/5.98}}$$

**The sodium-calcium exchanger ( $J_{NaCa}$ ):**

$$J_{NaCa} = g_{naca} \frac{1}{K_{m,Na}^3 + [Na^+]_o^3} \frac{1}{K_{m,Ca} + [Ca^{2+}]_o} \frac{e^{\xi a} [Na^+]_i^3 [Ca^{2+}]_o - e^{(\xi-1)a} [Na^+]_o^3 c_s}{1 + k_{sat} e^{(\xi-1)a}}.$$

**The L-type  $Ca_i$  current flux ( $J_{Ca}$ ):**

$$\begin{aligned}
 J_{Ca} &= -g_{Ca} d \cdot f \cdot f_{Ca} \cdot i_{Ca} \\
 \frac{df}{dt} &= \frac{f_{\infty} - f}{\tau_f} \\
 \frac{d(d)}{dt} &= \frac{d_{\infty} - d}{\tau_d} \\
 \frac{df_{Ca}}{dt} &= \frac{f_{Ca}^{\infty} - f_{Ca}}{\tau_{fca}} \\
 f_{\infty} &= \frac{1}{1 + e^{(V+35)/8.6}} \\
 d_{\infty} &= \frac{1}{1 + e^{-(V+5)/6.24}} \\
 f_{Ca}^{\infty} &= \frac{1}{1 + (c_s / \tilde{c}_s)^{\gamma}} \\
 i_{Ca} &= \frac{4VF^2}{RT} \left( \frac{c_s e^{2a} - 0.341[Ca^{2+}]_o}{e^{2a} - 1} \right)
 \end{aligned}$$

with  $a = VF / RT$ .

**The SR  $Ca_i$  release vs. SR  $Ca_i$  load relationship:**

$$Q(c'_j) = \begin{cases} 0 & 0 < c'_j < 50, \\ 1.5(c'_j - 50) & 50 < c'_j < 110, \\ uc'_j + s & c'_j > 110, \end{cases}$$

where the flux  $Q(c'_j)$  is in units of  $10^{-6} \mu\text{M}/\text{ms}$ , and where  $s = 90 - 110u$ .

**SERCA pump:**

In order for the formation of spatially discordant alternans, fluctuations in Ca cycling is crucial. We used fluctuations due to the finite number of SERCA channels in the cell following Sato et al. (Sato *et al.*, 2006) In this model, each SERCA pump is modeled as a two state system with closed (C) and open (O) states that obey

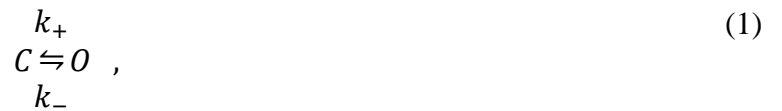

where the open rate is  $k_+c_i^2$  and the closed rate is a constant  $k_-$ . Here, the open rate is taken to be a function of the diastolic Ca concentration  $c_i$ . Given this reaction scheme then the total uptake current is

$$J_{up}(t) = N_{up} \cdot p \cdot i_{up}, \quad (2)$$

where  $i_{up}$  is the single channel flux in the open state,  $p$  is the fraction of SERCA channels open, and where  $N_{up}$  is the total number of SERCA channels within a sarcomere. Following Fox et al. (Fox & Lu, 1994) the fraction of open SERCA channels is approximated by the Langevin equation

$$\frac{dp}{dt} = k_+c_i^2(1-p) - k_-p + \eta(t), \quad (3)$$

where  $\eta(t)$  is a noise term that satisfies

$$\langle \eta(t)\eta(t') \rangle = \frac{k_+c_i^2(1-p) + k_-p}{N_{up}} \delta(t-t'). \quad (4)$$

This approach accounts for the stochastic fluctuations of Ca cycling due to the finite number of SERCA pumps in the cell. Spatially discordant alternans can be formed by Turing instability (Sato *et al.*, 2006) or competition between diffusion and fluctuations (Sato *et al.*, 2014). For these mechanisms, stochasticity in the model is essential. We used the stochastic SERCA pump for tissue simulations. For the single cell simulations, we used the deterministic SERCA pump model (i.e.  $N_{up} \rightarrow \infty$ ) (Sato *et al.*, 2006) or competition between diffusion and fluctuations. For these mechanisms, stochasticity in the model is essential. We used the stochastic SERCA pump for tissue simulations. For the single cell simulations, we used the deterministic SERCA pump model (i.e.  $N_{up} \rightarrow \infty$ )

### **Nonlinear buffering:**

Instantaneous buffering of calcium to SR, calmodulin, and Troponin C sites in the submembrane and bulk myoplasm are accounted for by the functions

$$\beta_s = \left( 1 + \frac{B_{SR}K_{SR}}{(c_s + K_{SR})^2} + \frac{B_{cd}K_{cd}}{(c_s + K_{cd})^2} + \frac{B_TK_T}{(c_s + K_T)^2} \right)^{-1},$$

$$\beta_i = \left( 1 + \frac{B_{SR}K_{SR}}{(c_i + K_{SR})^2} + \frac{B_{cd}K_{cd}}{(c_i + K_{cd})^2} + \frac{B_TK_T}{(c_i + K_T)^2} \right)^{-1}.$$

## TABLES

**Table 1: cytosolic buffering parameters**

| Parameter | Definition                                         | Value                        |
|-----------|----------------------------------------------------|------------------------------|
| $B_T$     | Total concentration of Troponin C                  | 70 $\mu\text{mol/l}$ cytosol |
| $B_{SR}$  | Total concentration of SR binding sites            | 47 $\mu\text{mol/l}$ cytosol |
| $B_{Cd}$  | Total concentration of Calmodulin binding sites    | 24 $\mu\text{mol/l}$ cytosol |
| $K_T$     | Dissociation constant for Troponin C               | 0.6 $\mu\text{M}$            |
| $K_{SR}$  | Dissociation constant for SR binding sites         | 0.6 $\mu\text{M}$            |
| $K_{Cd}$  | Dissociation constant for Calmodulin binding sites | 7 $\mu\text{M}$              |

**Table 2: SR release parameters**

| Parameter | Definition                      | Value                                   |
|-----------|---------------------------------|-----------------------------------------|
| $\tau_r$  | Spark lifetime                  | 20 ms                                   |
| $\tau_a$  | NSR-JSR diffusion time constant | 50 ms                                   |
| $g$       | Release current strength        | $7.5 \times 10^4$ sparks/ $\mu\text{M}$ |
| $u$       | Release slope                   | 1.5~18 $\text{ms}^{-1}$                 |

**Table 3: Exchanger and uptake parameters**

| Parameter  | Definition            | Value                 |
|------------|-----------------------|-----------------------|
| $C_{up}$   | Uptake threshold      | 0.5 $\mu\text{M}$     |
| $v_{up}$   | Strength of exchanger | 0.25 $\mu\text{M/ms}$ |
| $g_{NaCa}$ | Luo-Rudy II constant  | 6 $\mu\text{M/ms}$    |
| $k_{sat}$  | Luo-Rudy II constant  | 0.1                   |
| $\xi$      | Luo-Rudy II constant  | 0.35                  |
| $K_{m,Na}$ | Luo-Rudy II constant  | 87.5 mM               |
| $K_{m,Ca}$ | Luo-Rudy II constant  | 1.38 mM               |

**Table 4: Physical constants and ionic concentrations**

| Parameter     | Definition                       | Value                                  |
|---------------|----------------------------------|----------------------------------------|
| $C_m$         | Cell capacitance                 | $1.66 \times 10^{-4}$ $\mu\text{F}$    |
| $v_i$         | Cell volume                      | $2.58 \times 10^{-5}$ $\mu\text{l}$    |
| $v_s$         | Submembrane volume               | $0.1v_i$                               |
| $F$           | Faraday constant                 | 96.5 C/mmol                            |
| $R$           | Universal gas constant           | $8.315 \text{ Jmol}^{-1}\text{K}^{-1}$ |
| $T$           | Temperature                      | 308 K                                  |
| $[Na^+]_i$    | Internal sodium concentration    | 10 mM                                  |
| $[Na^+]_o$    | External sodium concentration    | 140 mM                                 |
| $[K^+]_i$     | Internal potassium concentration | 149.4 mM                               |
| $[K^+]_o$     | External potassium concentration | 4.0 mM                                 |
| $[Ca^{2+}]_o$ | External calcium concentration   | 1.8 mM                                 |

**Table 5: Ion current conductance**

| Parameter | Definition                | Value               |
|-----------|---------------------------|---------------------|
| $g_{Na}$  | Peak $I_{Na}$ conductance | 12 mS/ $\mu$ F      |
| $g_{to}$  | Peak $I_{to}$ conductance | 0.1 mS/ $\mu$ F     |
| $g_{K1}$  | Peak $I_{K1}$ conductance | 2.8 mS/ $\mu$ F     |
| $g_{Kr}$  | Peak $I_{Kr}$ conductance | 0.0136 mS/ $\mu$ F  |
| $g_{Ks}$  | Peak $I_{Ks}$ conductance | 0.0245 mS/ $\mu$ F  |
| $g_{Kp}$  | Peak $I_{Kp}$ conductance | 0.00221 mS/ $\mu$ F |

**Table 6: L-type Ca channel parameters**

| Parameter     | Definition                                      | Value                            |
|---------------|-------------------------------------------------|----------------------------------|
| $g_{Ca}$      | Adjustable strength of $J_{Ca}$                 | $1.46 \times 10^{-3} \mu$ M/C/ms |
| $\tau_f$      | Voltage dependent inactivation gate constant    | 30~200 ms                        |
| $\gamma$      | Exponent for Ca-induced inactivation            | 0.7                              |
| $\tilde{c}_s$ | Calcium inactivation threshold                  | 1.0 $\mu$ M                      |
| $\tau_d$      | Voltage dependent activation gate time constant | 5 ms                             |
| $\tau_{fca}$  | Calcium-induced inactivation gate time constant | 20 ms                            |

Fox RF & Lu Y. (1994). Emergent collective behavior in large numbers of globally coupled independently stochastic ion channels. *Physical Review E Statistical Physics, Plasmas, Fluids, and Related Interdisciplinary Topics* **49**, 3421-3431.

Mahajan A, Shiferaw Y, Sato D, Baher A, Olcese R, Xie LH, Yang MJ, Chen PS, Restrepo JG, Karma A, Garfinkel A, Qu Z & Weiss JN. (2008). A rabbit ventricular action potential model replicating cardiac dynamics at rapid heart rates. *Biophys J* **94**, 392-410.

Sato D, Bers DM & Shiferaw Y. (2014). Formation of Spatially Discordant Alternans Due to Fluctuations and Diffusion of Calcium. *PLoS ONE* **8**, e85365.

Sato D, Shiferaw Y, Garfinkel A, Weiss JN, Qu Z & Karma A. (2006). Spatially discordant alternans in cardiac tissue: role of calcium cycling. *Circulation research* **99**, 520-527.

Shiferaw Y, Sato D & Karma A. (2005). Coupled dynamics of voltage and calcium in paced cardiac cells. *Phys Rev E Stat Nonlin Soft Matter Phys* **71**, 021903.
